# Supplementary material
Source: JCI journal article supplement (doi:10.1172/jci188637)
Supplement: sd1 [file 1]

**Table 1:  
Primers for qRT-  
PCR**

| <b>mouse</b> | Forward (5' > 3')      | Reverse (5' > 3')    |
|--------------|------------------------|----------------------|
| Srebf2       | GGGCTTCTTGGCTAGCTACT   | CAAGGACTCCACCGCTCTTT |
| Hmgcr        | TTGGCCTCCATTGAGATCCG   | CTGCTCAGCACGTCCTCTTC |
| Apob         | TTCCAGATTGCTAGGCTCCC   | CTGGTAGGTATCACGGGCT  |
| Fabp4        | TCACCATCCGGTCAGAGAGT   | TTCATCGAATTCCACGCCCA |
| Asns         | CCTTTTATCAGGGGGCCTGG   | CAGATGCCCGAACTGTCGTA |
| Igf1         | AATCAGCAGCCTTCCAACCTCA | GAGCTGGTGAAGGTGAGCAA |

| <b>human</b> | Forward (5' > 3')     | Reverse (5' > 3')      |
|--------------|-----------------------|------------------------|
| SREBF2       | ATGGGCAGCAGAGTTCCTTC  | CGACAGTAGCAGGTCACAGG   |
| HMGCR        | CGATGCATAGCCATCCTGTA  | GTGCTTGCTCTGGAAAGGTC   |
| FASN         | GGTCTTGAGAGATGGCTTGC  | AATTGGCAAAGCCGTAGTTG   |
| LDLR         | TTCACTCCATCTCAAGCATCG | ACTGAAAATGGCTTCGTTGATG |
| CPT1A        | GCAGCGTTCTTTGTGACGTT  | AGGAGTGTTTACGCGTTGAGG  |

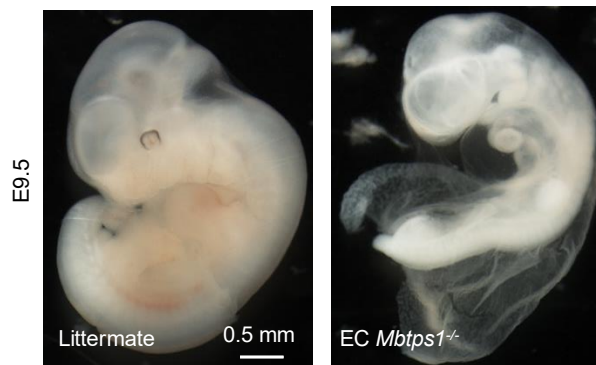

**Supplemental Figure 1.** Embryonic lethality of mice lacking endothelial- and hematopoietic-S1P (EC *Mbtps1*<sup>-/-</sup>, n > 15 embryos in each genotype). All littermate controls are alive while all the EC *Mbtps1*<sup>-/-</sup> embryos are dead based on heart beating.

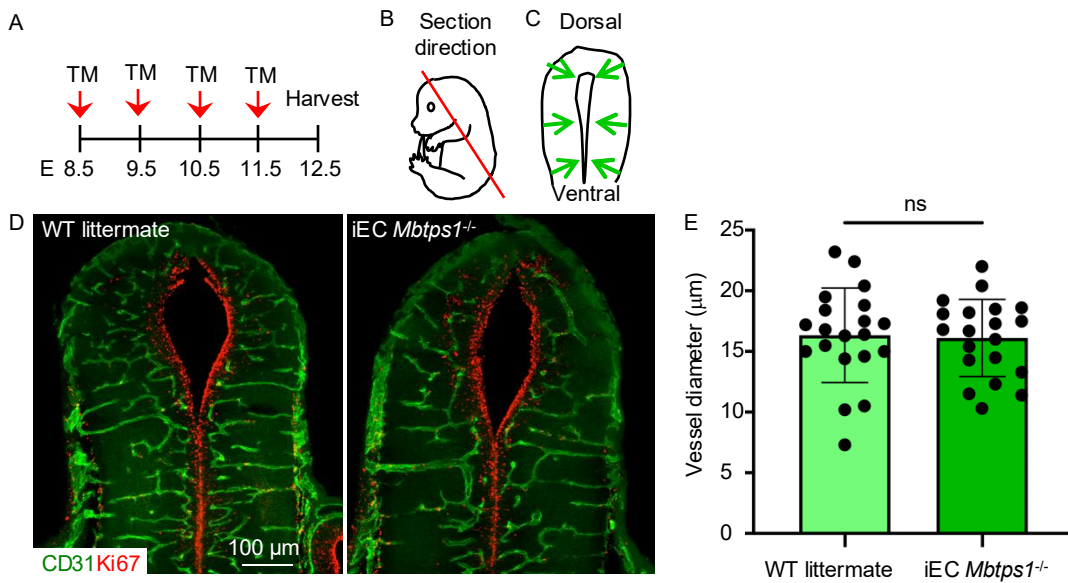

**Supplemental Figure 2. Relatively normal blood angiogenesis in iEC *Mbtps1*<sup>-/-</sup> mice.** **A.** Tamoxifen-induced S1P deletion strategy in iEC *Mbtps1*<sup>-/-</sup> mice. **B.** A diagram depicting the sagittal section of an embryo (E12.5). **C.** A diagram illustrating the directional growth of blood vessels toward the subventricular zone at E12.5 on the sagittal section. **D.** Confocal images of blood vasculature in the developing neural tissues at E12.5. CD31: blood vessels, Ki67: proliferating radial glial cells. **E.** Quantification of vessel diameters in the E12.5 brain by ImageJ. n=15 images/genotype. Data represent at least three experiments. The graphs were plotted as Mean ± SD. An unpaired t- test was performed for the statistical analysis. ns: not significant.

### Supplemental Figure 3

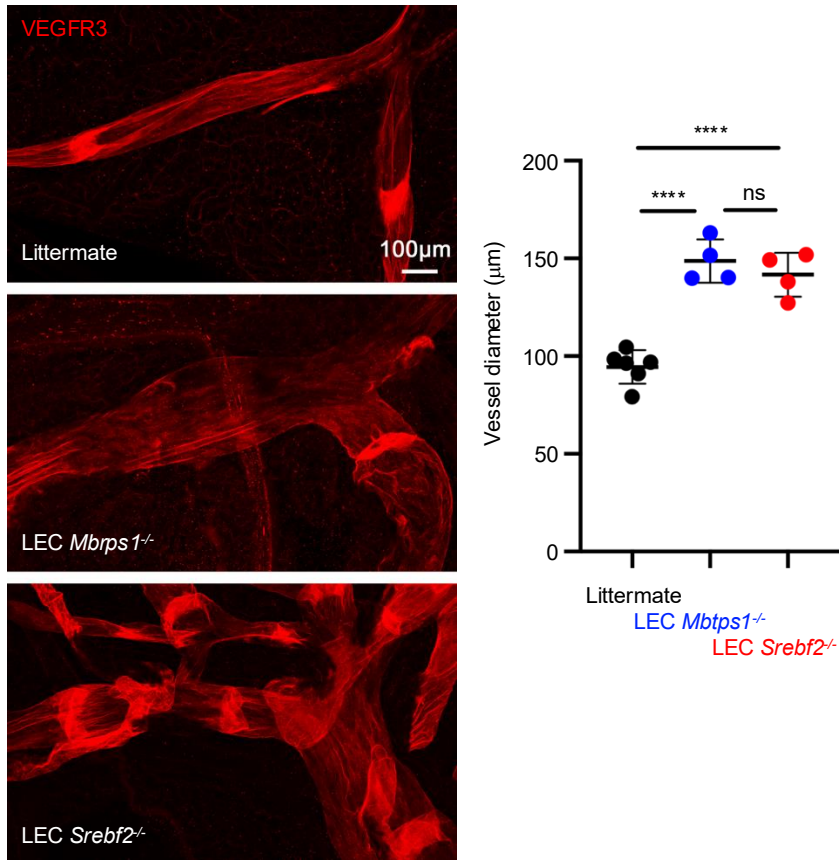

**Supplemental Figure 3. Mice with lymphatic endothelial cell-specific MBTPS1 or SREBP2 deletion show enlarged mesenteric collecting lymphatic vessels.** Representative whole-mount IF images of mesenteric lymphatic vessels (red) of littermate controls, *LEC Mbtps1<sup>-/-</sup>* and *LEC Srebf2<sup>-/-</sup>* mice (20 days of age). The diameter of the vessels are significantly increased in the mutant mice compared with that in the controls.  $n=6$  for littermate controls;  $n=4$  for each mutant genotype, respectively. 4 mesenteric collecting lymphatic vessels from the jejunum section of each animal were analyzed. Each dot represents one mouse on the graph. The graphs were plotted as Mean  $\pm$  SD. One way ANOVA was performed for the statistical analysis. ns: not significant. \*\*\*\* $p < 0.0001$ .

# Supplemental Figure 4

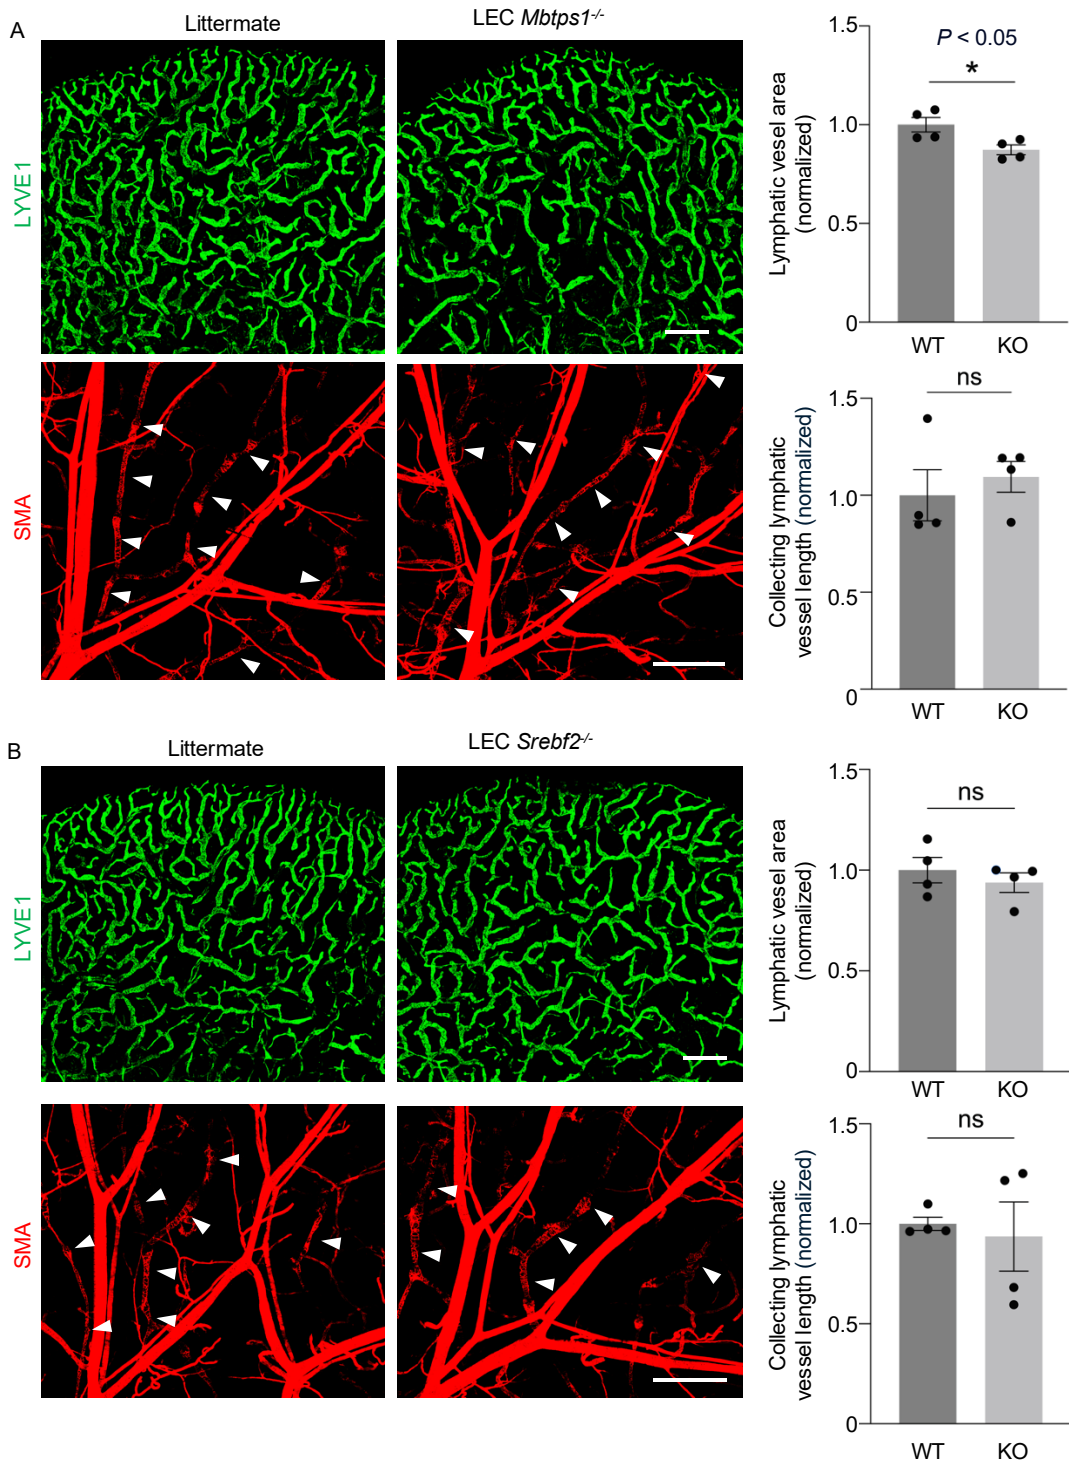

**Supplemental Figure 4: Effect of loss of LEC *Mbtps1* or *Srebf2* on lymphatic vessel development in the postnatal ear skin.** **A.** Up left, representative stitched images of the dorsal ear skin of wildtype littermate (WT) and *Mbtps1* knockout (KO) mice stained for LYVE1; Up right, quantification of the lymphatic microvessel area of the dorsal ear skin standardized to wildtype mice. Lower left, representative stitched images of the dorsal ear skin of wildtype and *Mbtps1* knockout mice stained for  $\alpha$ -smooth muscle actin (SMA). White arrows denote SMA-positive collecting lymphatic vessels; Lower right, quantification of the collecting lymphatic vessel length of the dorsal ear skin standardized to wildtype mice. **B.** Up left, representative stitched images of the dorsal ear skin of wildtype (WT) and *Srebf2* knockout (KO) mice stained for LYVE1; Up right, quantification of the lymphatic microvessel area of the dorsal ear skin standardized to wildtype mice. Lower Left, representative stitched images of the dorsal ear skin of wildtype and *Srebf2* knockout mice stained for SMA. White arrows denote SMA-positive collecting lymphatic vessels; Lower right, quantification of the collecting lymphatic vessel length of the dorsal ear skin standardized to wildtype mice. Scale bar, 100  $\mu$ m. n = 4 ears per group. Data represent mean  $\pm$  SEM, Unpaired t-test with Welch's correction. ns: not significant.

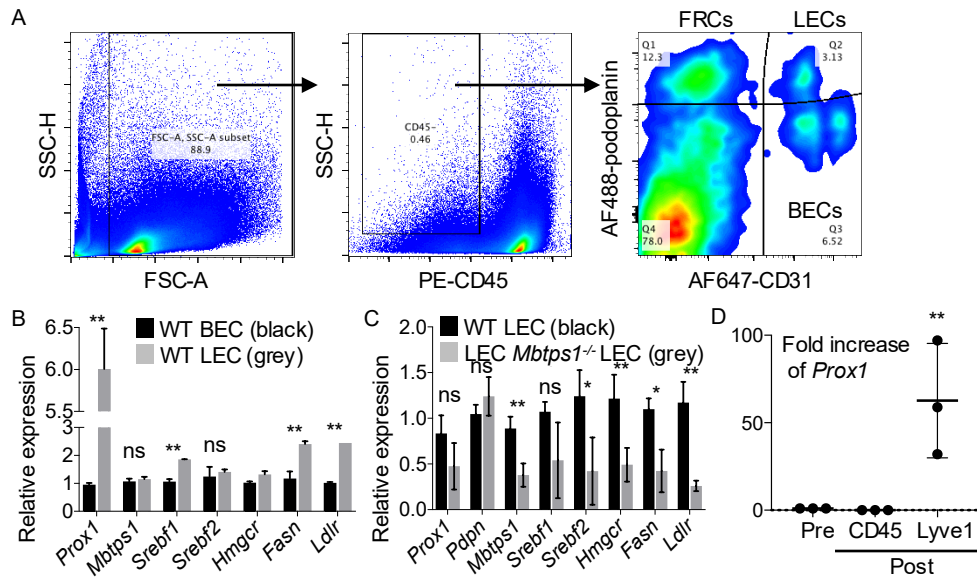

**Supplemental Figure 5. Reduced lipogenic gene expression in the lymphatic endothelial cells of LEC *Mbtps1*<sup>-/-</sup> mice.** **A.** Cell sorting strategy of BECs and LECs from the lymph nodes of adult mice (6 weeks) LECs; lymphatic endothelial cells, BECs; blood endothelial cells. **B.** Differential expression of lipogenic genes between WT BECs (black) and WT LECs (grey) (N = 3 in each genotype). **C.** Reduced lipogenic gene expression in WT LECs (black) and LEC *Mbtps1*<sup>-/-</sup> LECs (grey). Data represent mean  $\pm$  SEM, Unpaired t- test was performed for the statistical analysis. ns: not significant (N = 3 in each genotype). **D.** Magnetic cell separation efficiency of *Prox1*<sup>+</sup> LECs from embryonic skin using anti-Lyve1-beads for qRT-PCR (N = 3). Data represent at least three experiments. The graphs were plotted as Mean  $\pm$  SD. One way ANOVA was performed for the statistical analysis. \*P<0.05, \*\*P<0.01.

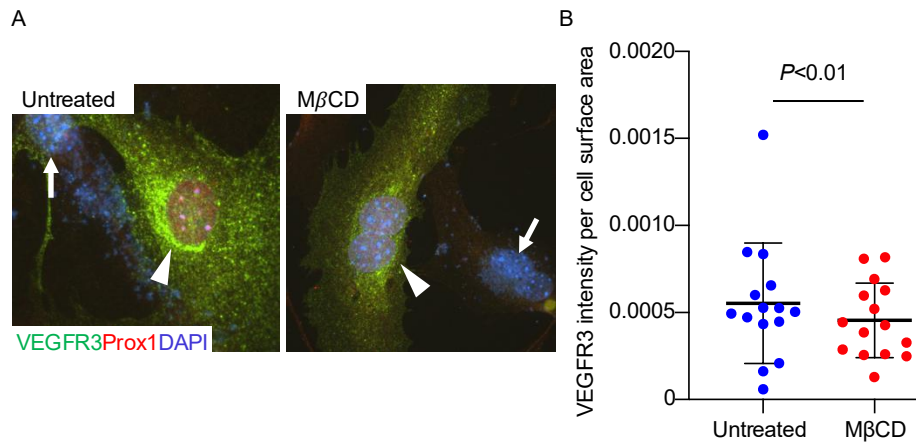

**Supplemental Figure 6. Methyl- $\beta$ -cyclodextrin treatment reduced VEGFR3 in cultured hLECs.** **A.** Immunofluorescence of VEGFR3 and Prox1 in cultured human LECs. LECs were treated with methyl- $\beta$ -cyclodextrin (30 min) before staining. Arrowhead indicates LECs, Arrow indicates non-LECs. **B.** Quantification of VEGFR3 signal intensity per cell surface area in **A** was performed using ImageJ software (n = 15). Data represent mean  $\pm$  SD, unpaired t-test with Welch's correction was performed for the statistical analysis.

**Supplementary Movie 1:** 3D view of small intestinal lacteal and submucosal lymphatics of the littermate control.

**Supplementary Movie 2:** 3D view of small intestinal lacteal and submucosal lymphatics of LEC *Srebf2*<sup>-/-</sup> mouse.
